# Supplementary material
Source: publisher figshare collection journal article supplement (https://gsapubs.figshare.com/ndownloader/files/22741145)
Supplement: Supplementary file 1 [file 22741145]

TABLE DR1. PDI VALUES FOR SOIL PITS AND COSMOGENIC AGES FOR NEAREST SAMPLED BOULDERS

| Soil pit | Fan unit    | Nearest sampled boulders* | Age <sup>†</sup><br>(ka) | PDI  |
|----------|-------------|---------------------------|--------------------------|------|
| Soil 1   | West        | FSF-AE, FSF-AD            | 139.0 ± 9.0              | 18.4 |
| Soil 10  |             | FSF-X                     | 133.0 ± 19.9             | 2.9  |
| Soil 11  |             | FSF-AC                    | 161.9 ± 28.0             | 12.3 |
| Soil 2   | North fan A | Average                   | 13.2 ± 0.9               | 3.3  |
| Soil 3   |             | Average                   | 13.2 ± 0.9               | 3.7  |
| Soil 4   |             | FSF-W, FSF-V1,V2          | 13.1 ± 0.4               | 3.1  |
| Soil 5   |             | FSF-C, FSF-B              | 11.8 ± 0.6               | 2.2  |
| Soil 7   |             | Average                   | 13.2 ± 0.9               | 3.4  |
| Soil 9   |             | Average                   | 13.2 ± 0.10              | 3.8  |
| Soil 6   | South fan   | FSF-AH <sup>‡</sup>       | 1.5 ± 0.6                | 1.5  |

\*"Average" indicates that average exposure age for fan unit was used due to lack of nearby sample sites.

<sup>†</sup>Ages indicate individual boulder ages, or average age of boulders listed in column 3. Ages calculated using production rates of Nishiizumi et al. (1989).

<sup>‡</sup>Youngest boulder was chosen because soil PDI reflects most recent debris-flow deposition on south fan.
